# Supplementary figures and images for: International consensus recommendations for management of new onset refractory status epilepticus including febrile infection‐related epilepsy syndrome: Statements and supporting evidence
Source: PubMed Central journal article supplement — Epilepsia. 2022 Sep 27;63(11):2840–64. doi: 10.1111/epi.17397 (PMC9828002; doi:10.1111/epi.17397), 2022-09-27

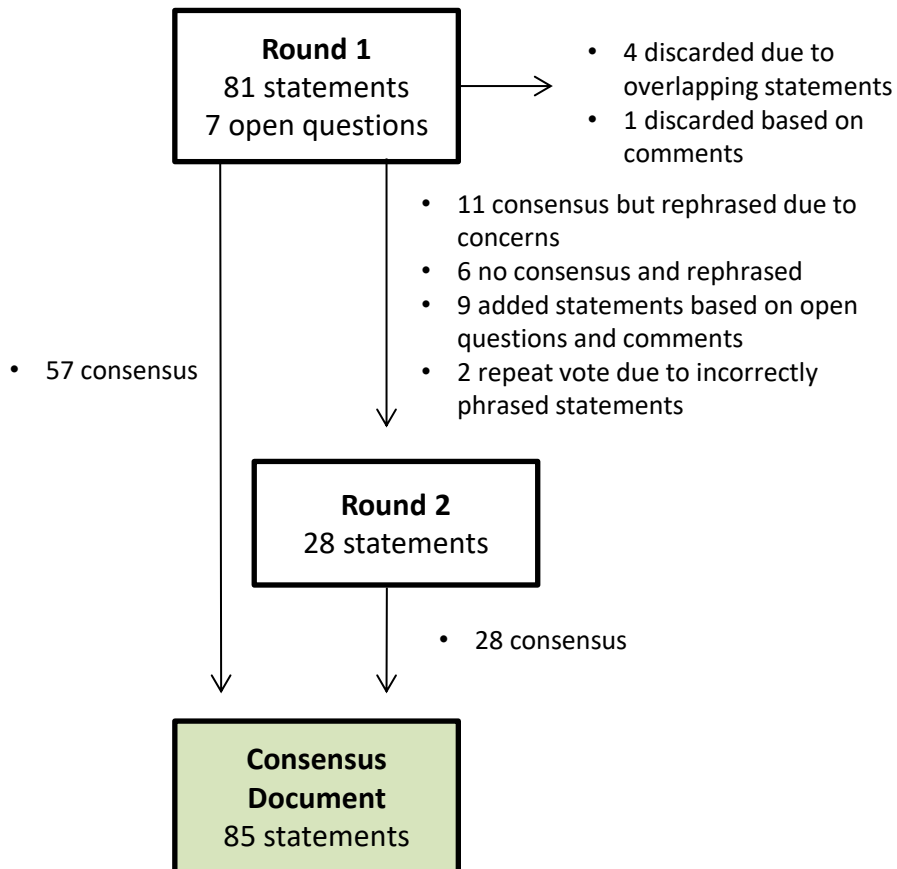

Supplement: EPI-63-2840-s001.pdf [file EPI-63-2840-s001.pdf]
